# Supplementary material
Source: PubMed Central journal article supplement (PMC4105849)

# Supplemental Fig S1

A

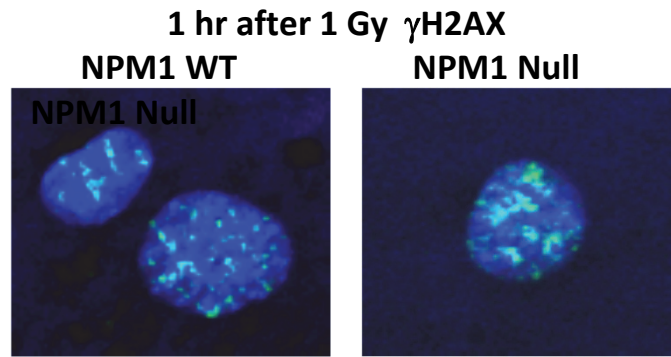

B

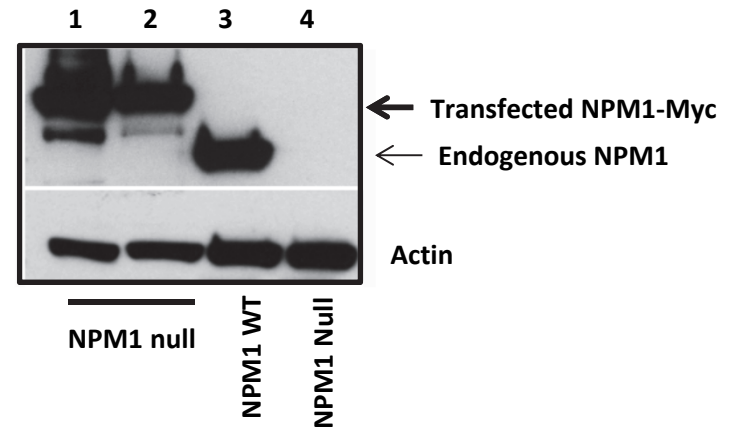

C

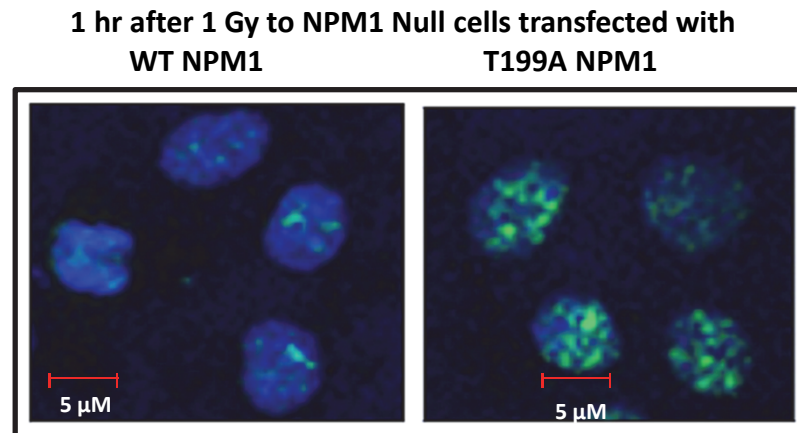

Supplemental Fig S2

**NPM1 WT sham**

**NPM1 Null sham**

**NPM1 WT 4 Gy 4 h**

**NPM1 Null 4 Gy 4 h**

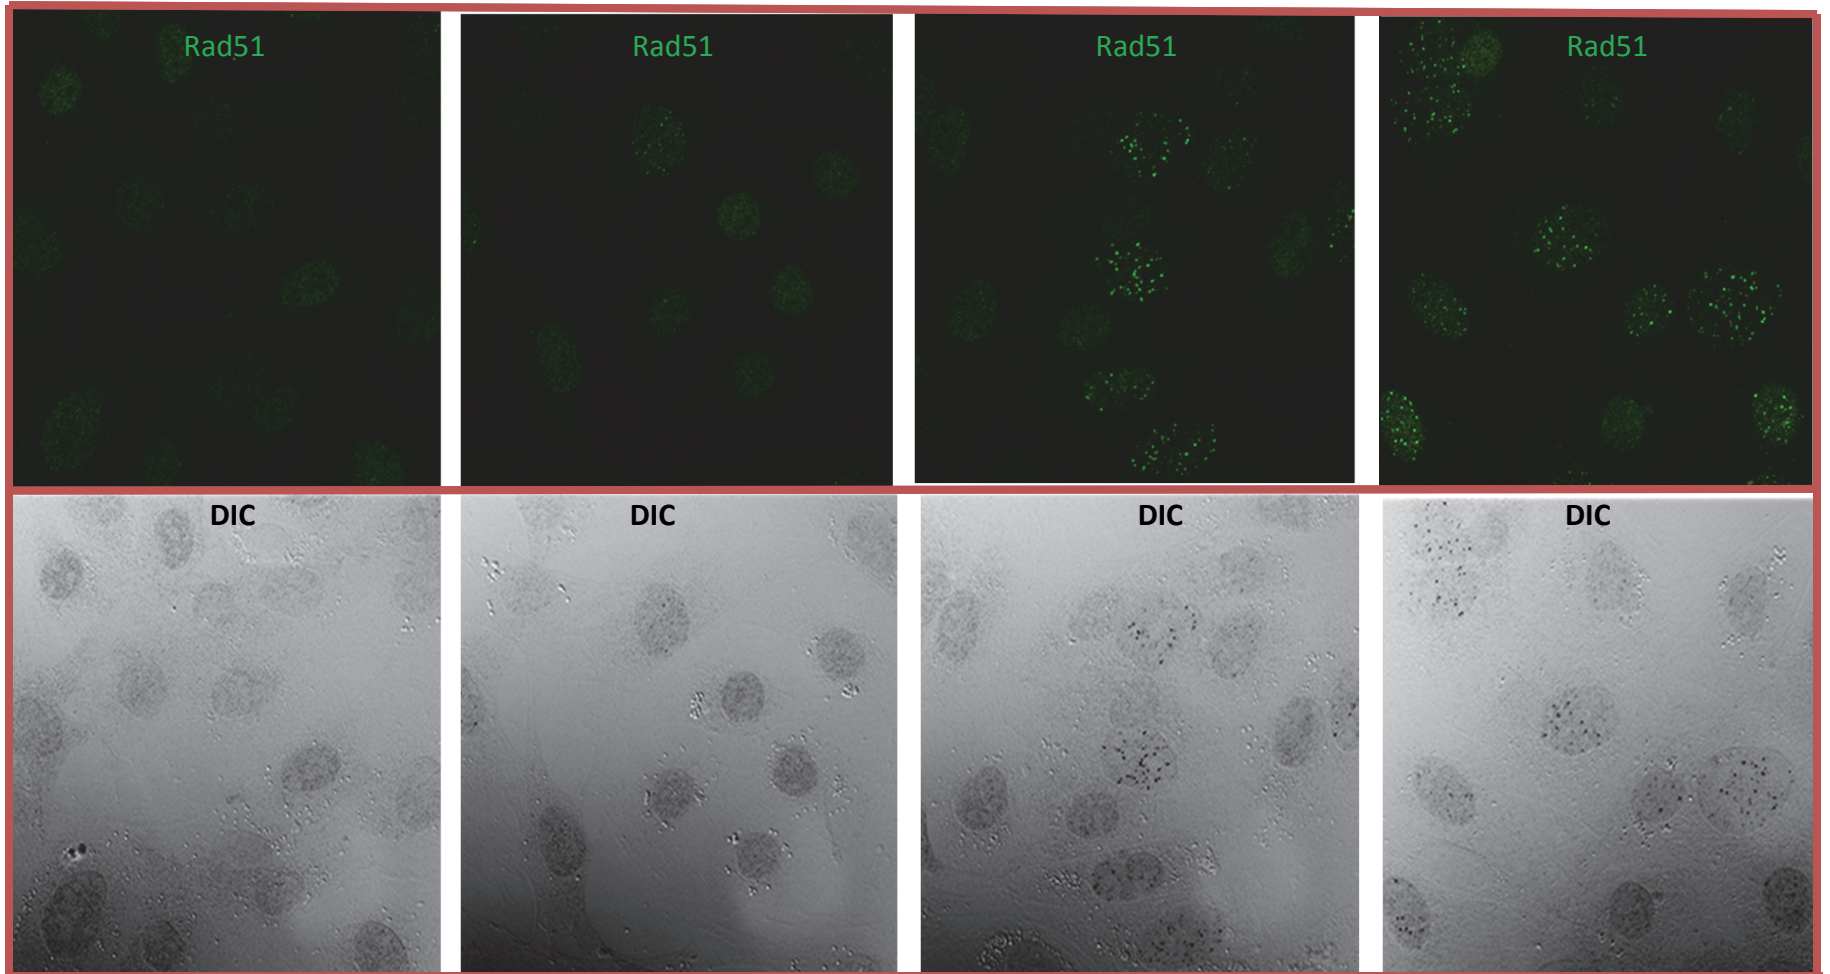

Supplemental Fig S3

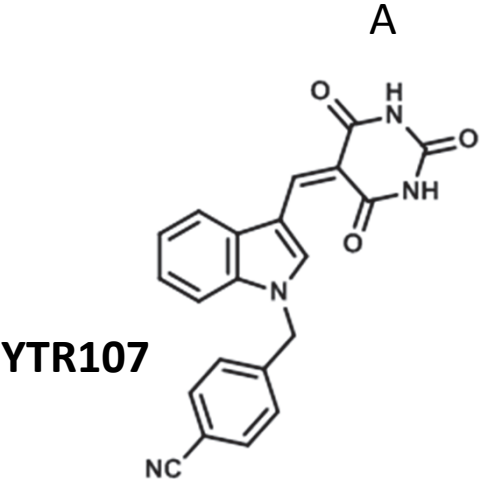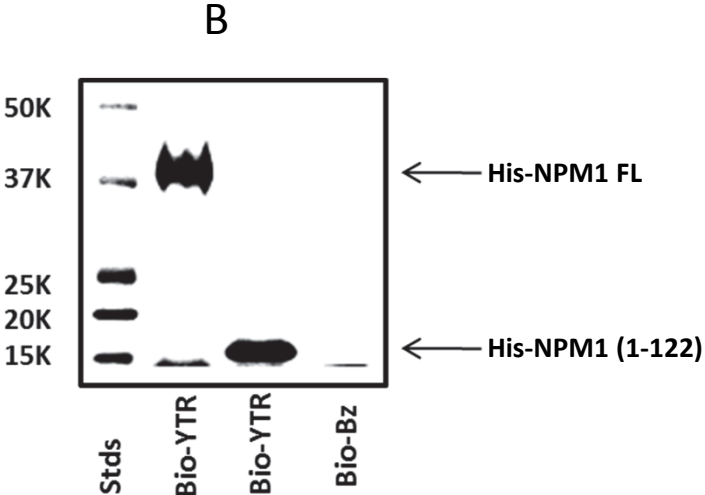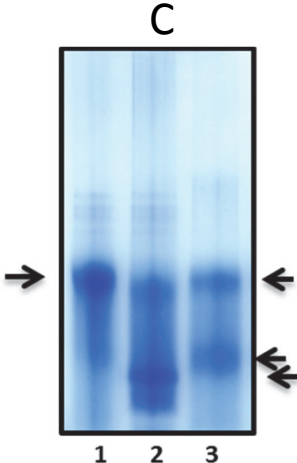

Supplemental Fig S4

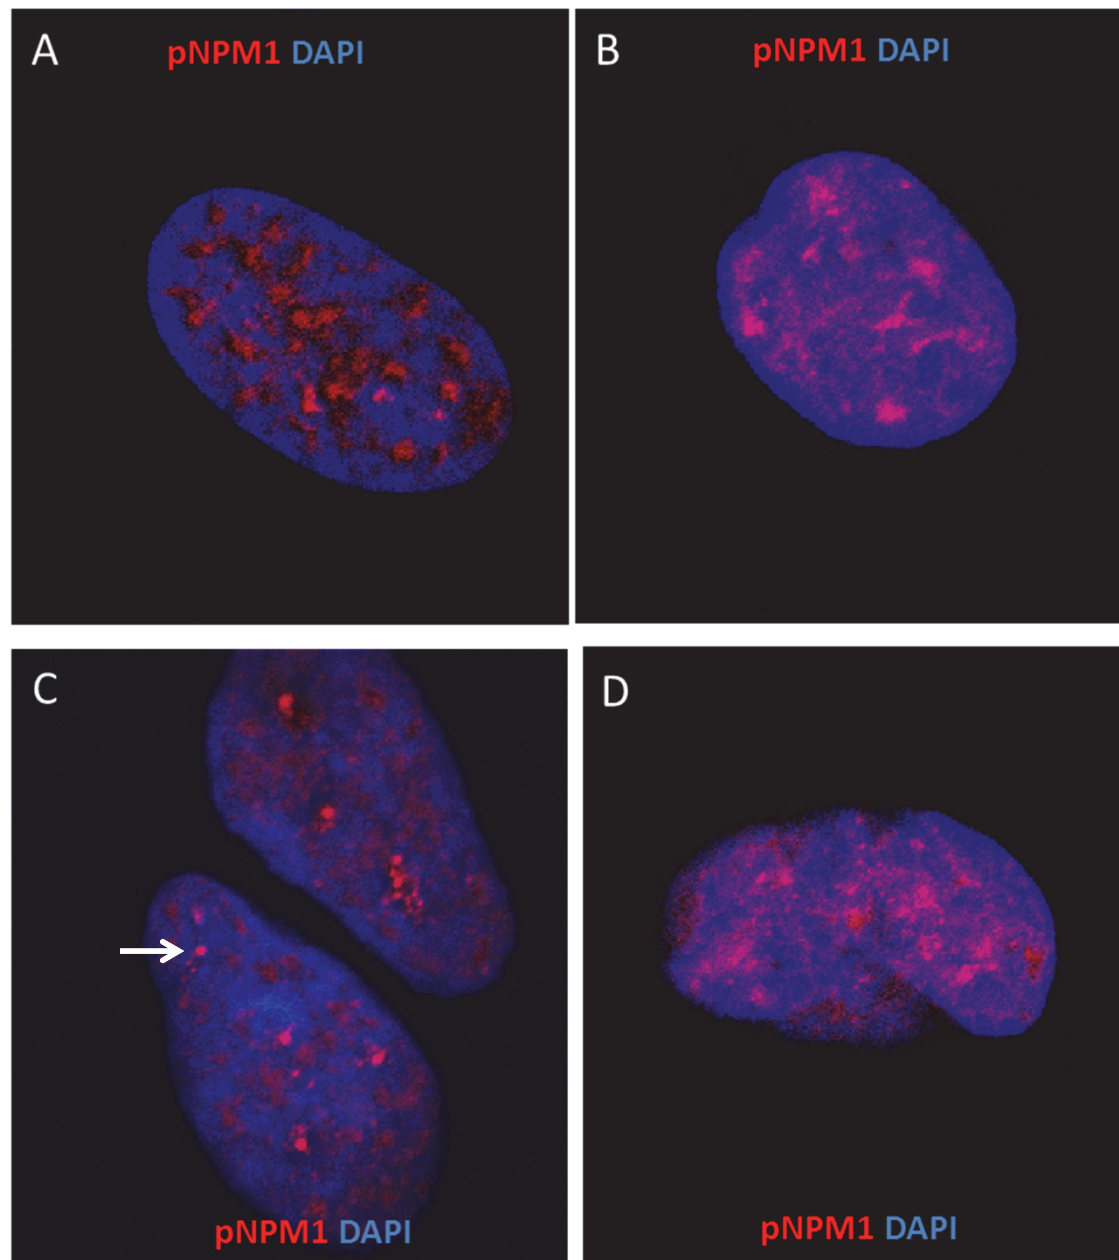

# Supplemental Fig S5

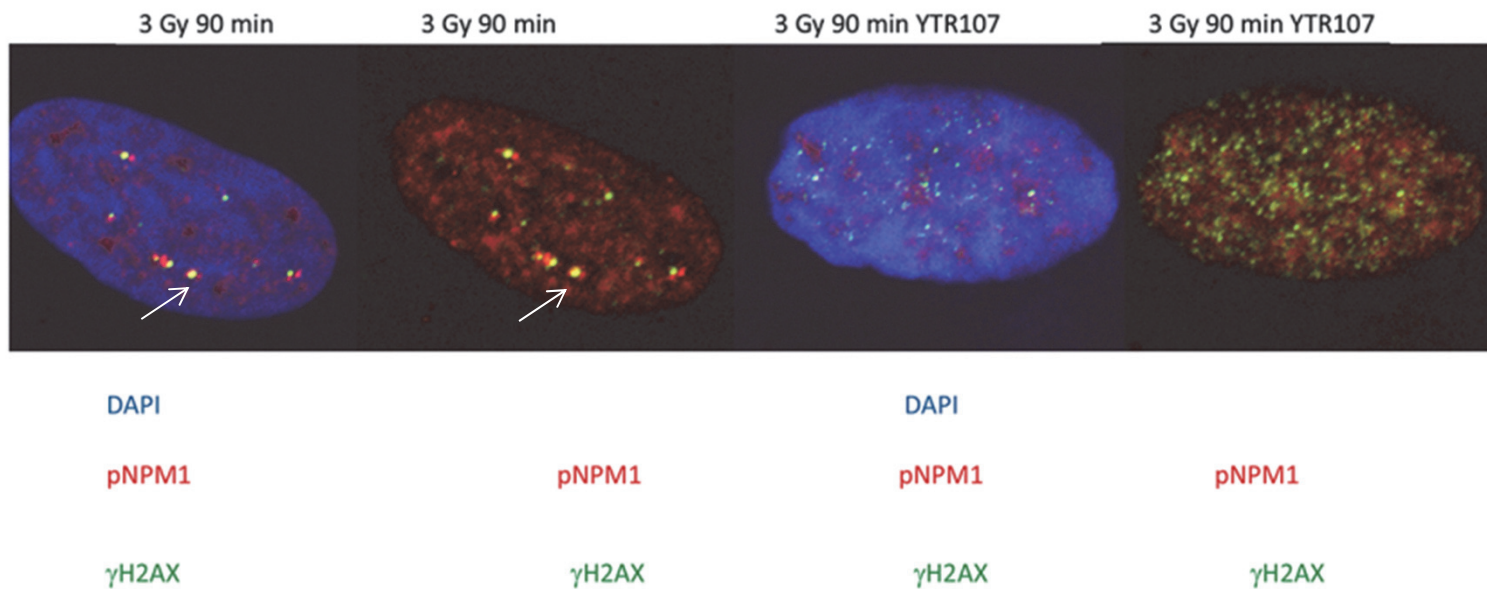



# Supplemental Fig S6

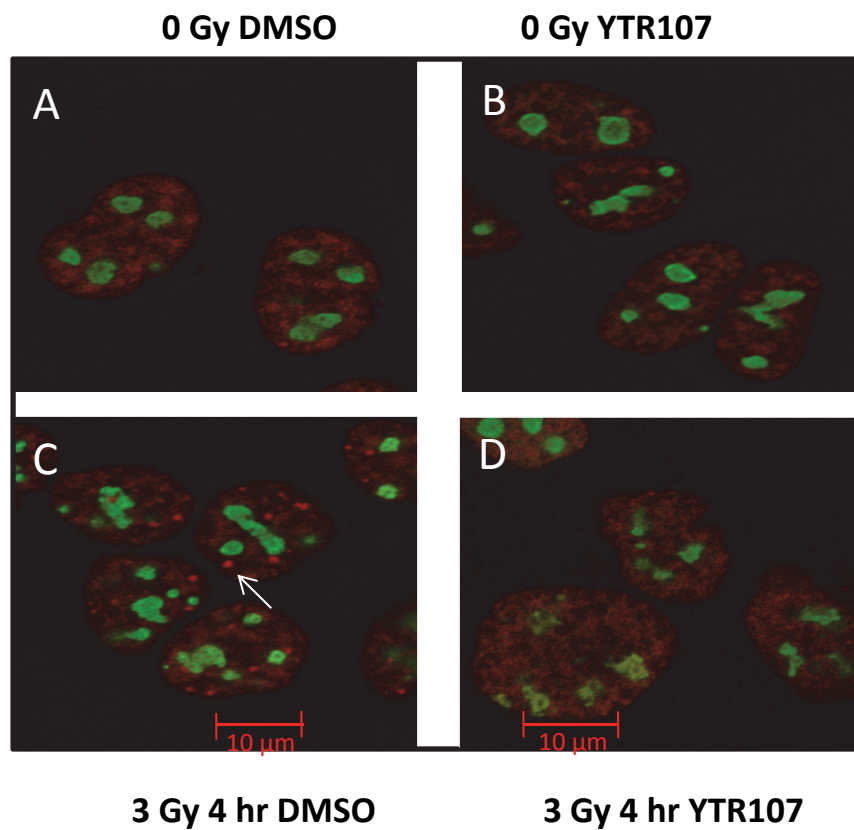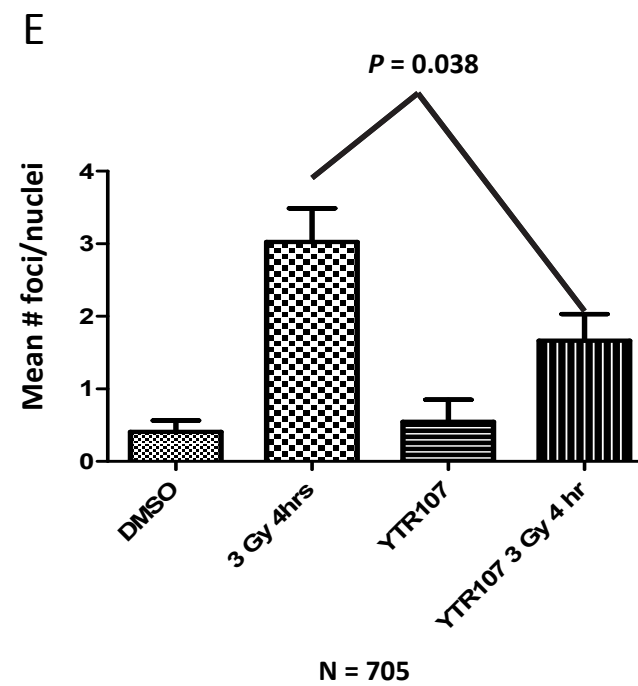

# Supplemental Fig S7

## NPM1 mRNA expression in NSCLC Oncomine database

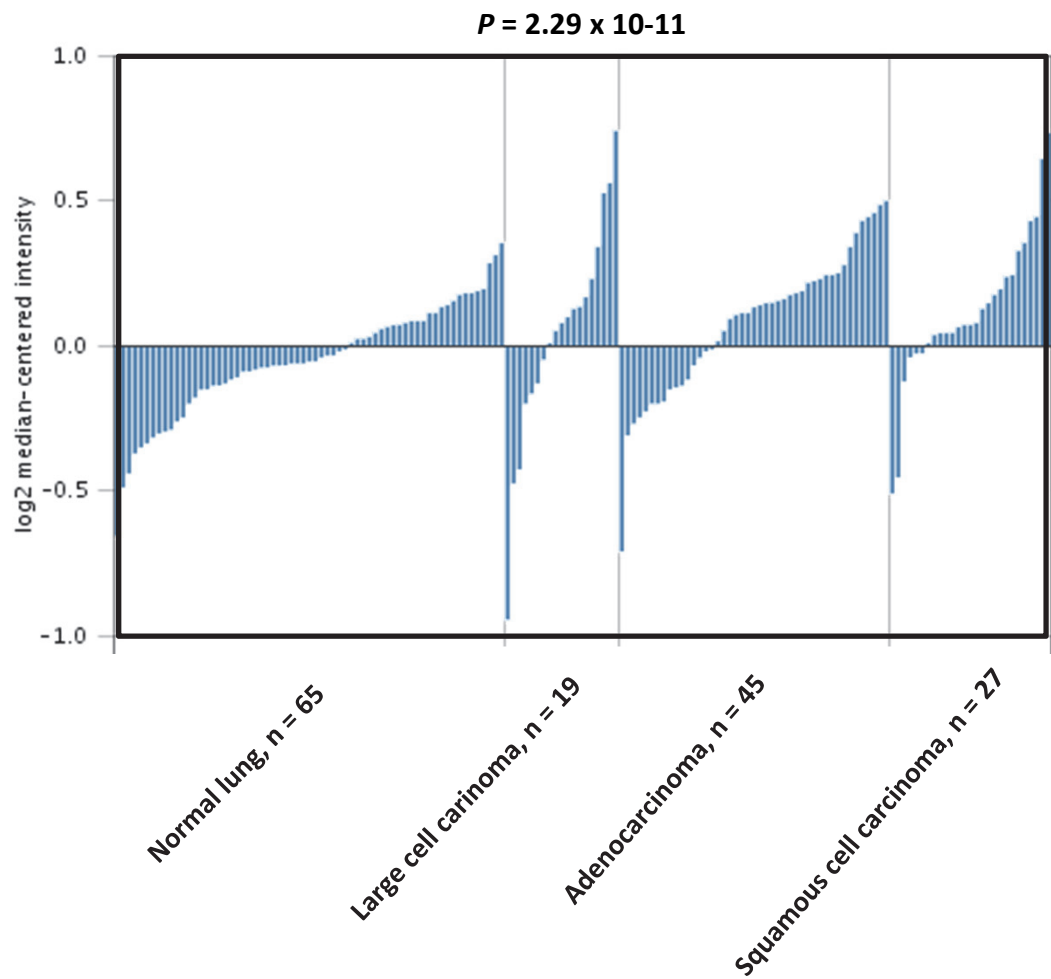

# Supplemental Fig S8

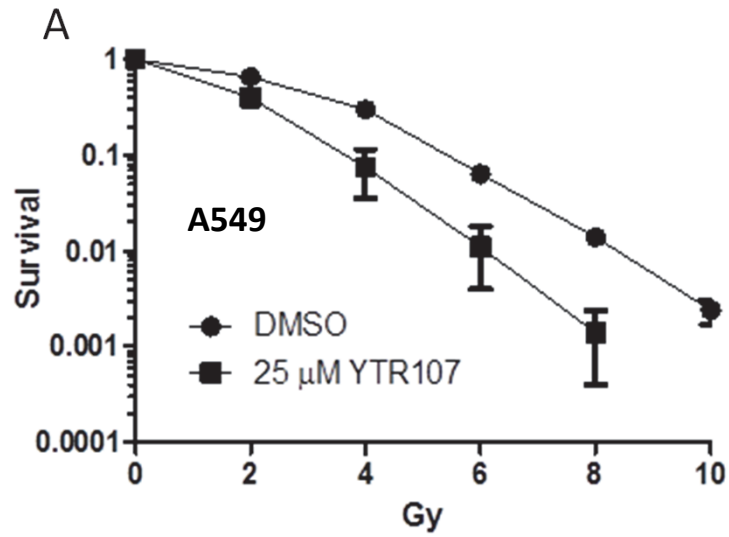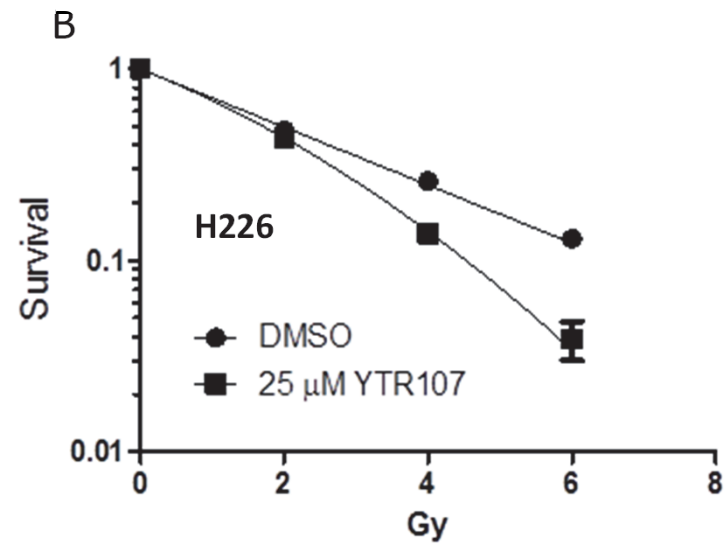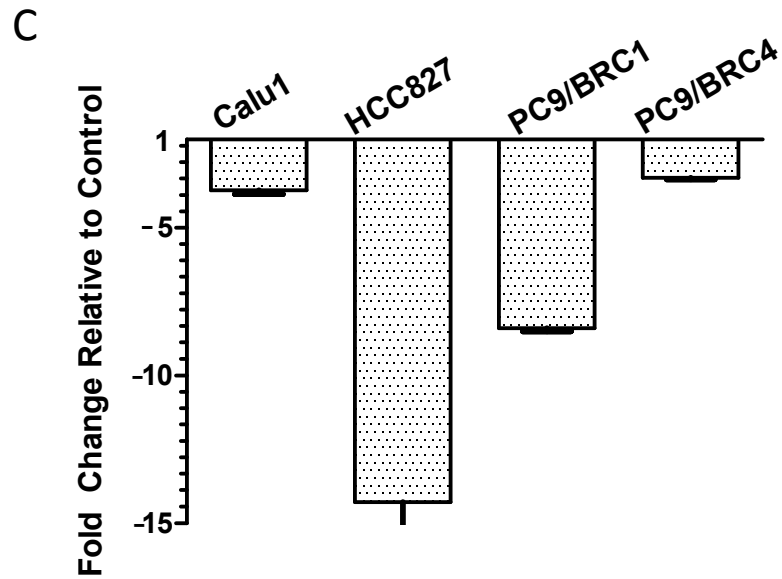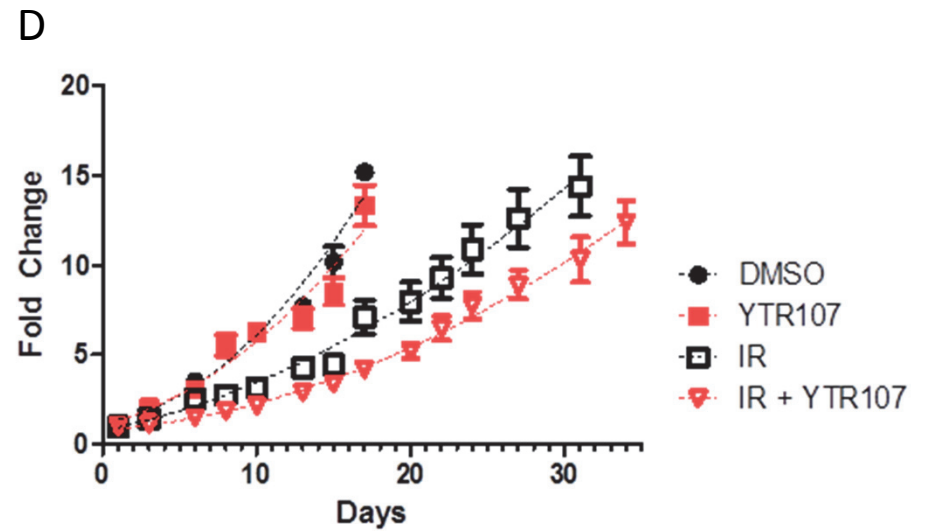

Supplement: NIHMS588848-supplement-03.pdf [file NIHMS588848-supplement-03.pdf]
