# Supplementary material
Source: PubMed Central journal article supplement (PMC4105849)
Supplement: NIHMS588848-supplement-02.pdf [file NIHMS588848-supplement-02.pdf]

Table S1

| Cell line    | Treatment                      | PE   | SF <sub>2</sub> +/- SD | D <sub>0</sub> | n    | α                 | β                  | SER <sub>10%</sub><br>+/- SEM | R <sup>2</sup> |
|--------------|--------------------------------|------|------------------------|----------------|------|-------------------|--------------------|-------------------------------|----------------|
| Wt-MEF       | Irradiation                    | 0.16 | 1.0 +/-<br>0.03        | 2.4            | 5.52 |                   |                    |                               | 0.98           |
| NPM-null MEF | Irradiation                    | 0.20 | 0.66 +/-<br>0.01       | 2.4            | 3.04 |                   |                    |                               | 0.99           |
| H460         | Irradiation                    | 0.70 | 0.81 +/-<br>0.02       |                |      | 0.094 +/-<br>0.01 | 0.054 +/-<br>0.003 | 1.5 +/-<br>0.2                | 0.99           |
| H460         | Irradiation<br>25 μM<br>YTR107 | 0.41 | 0.40 +/-<br>0.05       |                |      | 0.27 +/-<br>0.06  | 0.09 +/-<br>0.02   |                               | 0.99           |
| A549         | Irradiation                    | 0.64 | 0.64 +/-<br>0.03       |                |      | 0.18 +/-<br>0.02  | 0.021 +/-<br>0.006 | 1.56 +/-<br>0.09              | 0.99           |
| A549         | Irradiation<br>25 μM<br>YTR107 | 0.46 | 0.45 +/-<br>0.06       |                |      | 0.30 +/-<br>0.06  | 0.049 +/-<br>0.01  |                               | 0.98           |
| H226         | Irradiation                    | 0.35 | 0.48 +/-<br>0.01       |                |      | 0.35 +/-<br>.01   | 0                  | 1.46 +/-<br>0.03              | 0.99           |
| H226         | Irradiation<br>25 μM<br>YTR107 | 0.22 | 0.44 +/-<br>0.05       |                |      | 0.34              | 0.037 +/-<br>0.03  |                               | 0.99           |

Table S2

| Tumor | equation            | Treatment                   | R <sup>2</sup> | Days to increase<br>tumor volume 5<br>fold | Days to increase<br>tumor volume 10<br>fold |
|-------|---------------------|-----------------------------|----------------|--------------------------------------------|---------------------------------------------|
| LLC   | $Y = ax^2 + bx + c$ | DMSO                        | 0.998          | 4                                          |                                             |
|       |                     | 10 mg/kg YTR107             | 0.980          | 4                                          |                                             |
|       |                     | DMSO + 2.4 Gy               | 0.992          | 8                                          |                                             |
|       |                     | 10 mg/kg YTR107<br>+ 2.4 Gy | 0.990          | 11                                         |                                             |
| A549  | $Y = ax^2 + bx + c$ | DMSO                        | 0.932          | 8                                          | 14                                          |
|       |                     | 20 mg/kg YTR107             | 0.849          | 8                                          | 14                                          |
|       |                     | DMSO + 2.4 Gy               | 0.834          | 14                                         | 23                                          |
|       |                     | 20 mg/kg YTR107<br>+ 2.4 Gy | 0.893          | 19                                         | 30                                          |
